# Supplementary material for: High Potential of a Transposon mPing as a Marker System in japonica × japonica Cross in Rice
Source: PubMed Central journal article supplement — DNA Res. 2009 Mar 6;16(2):131–40. doi: 10.1093/dnares/dsp004 (PMC2671205; doi:10.1093/dnares/dsp004), 2009-03-06

Supplementary Figure 1. Histograms of days to heading in F<sub>7</sub> RIL populations

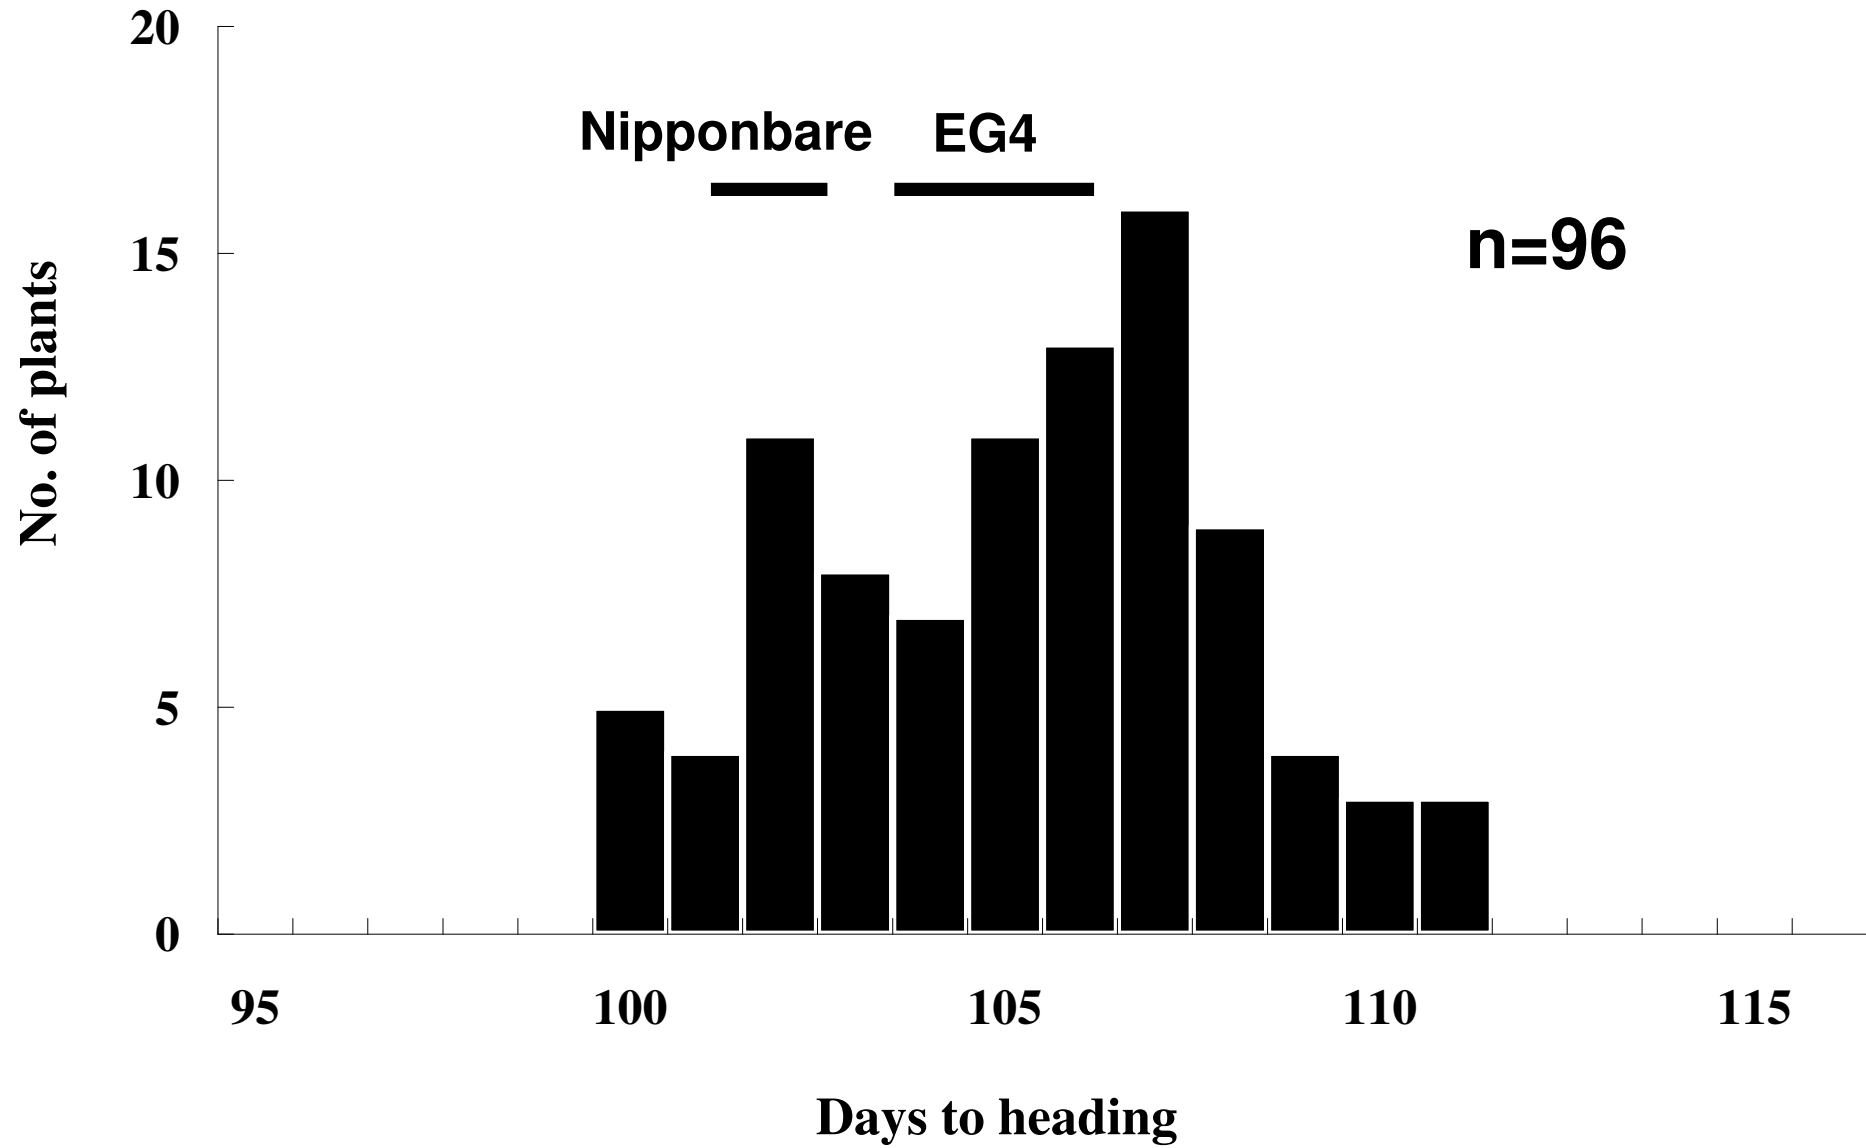

Supplementary Figure 2. Composite interval mapping results in 2005(a) and 2007(b).

a

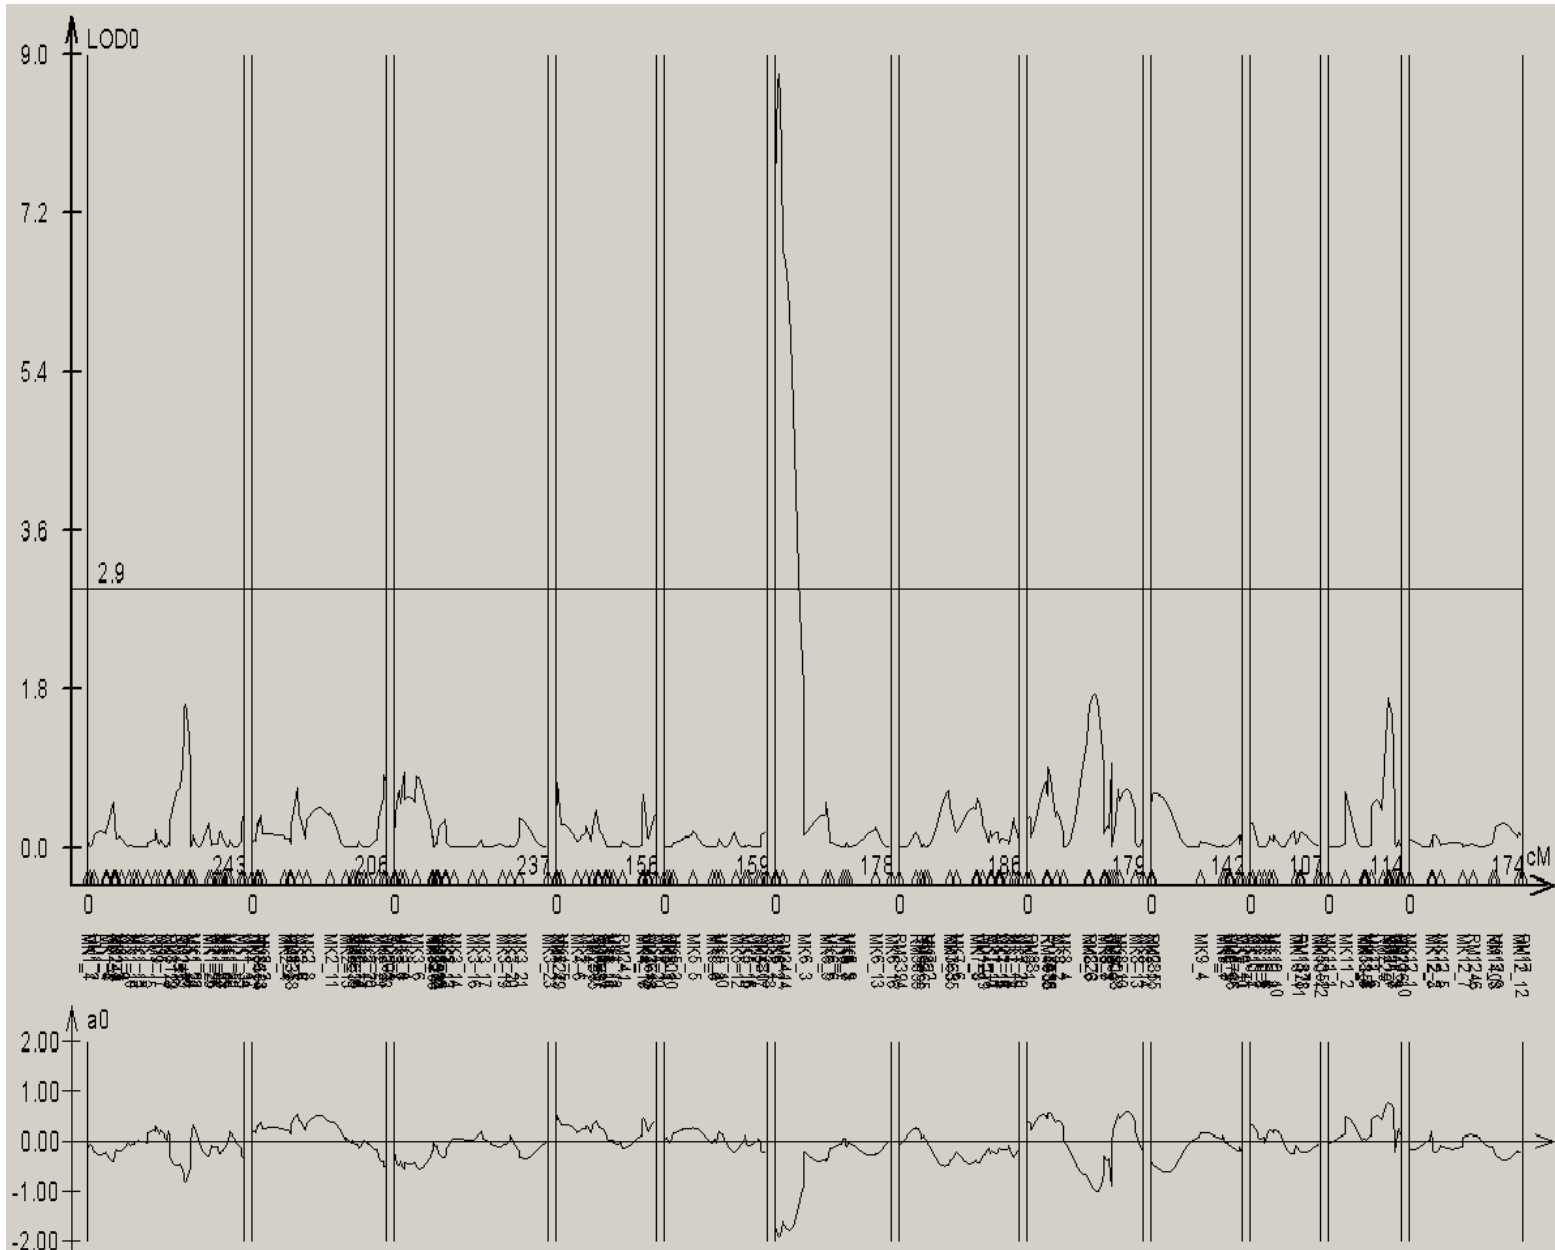

b

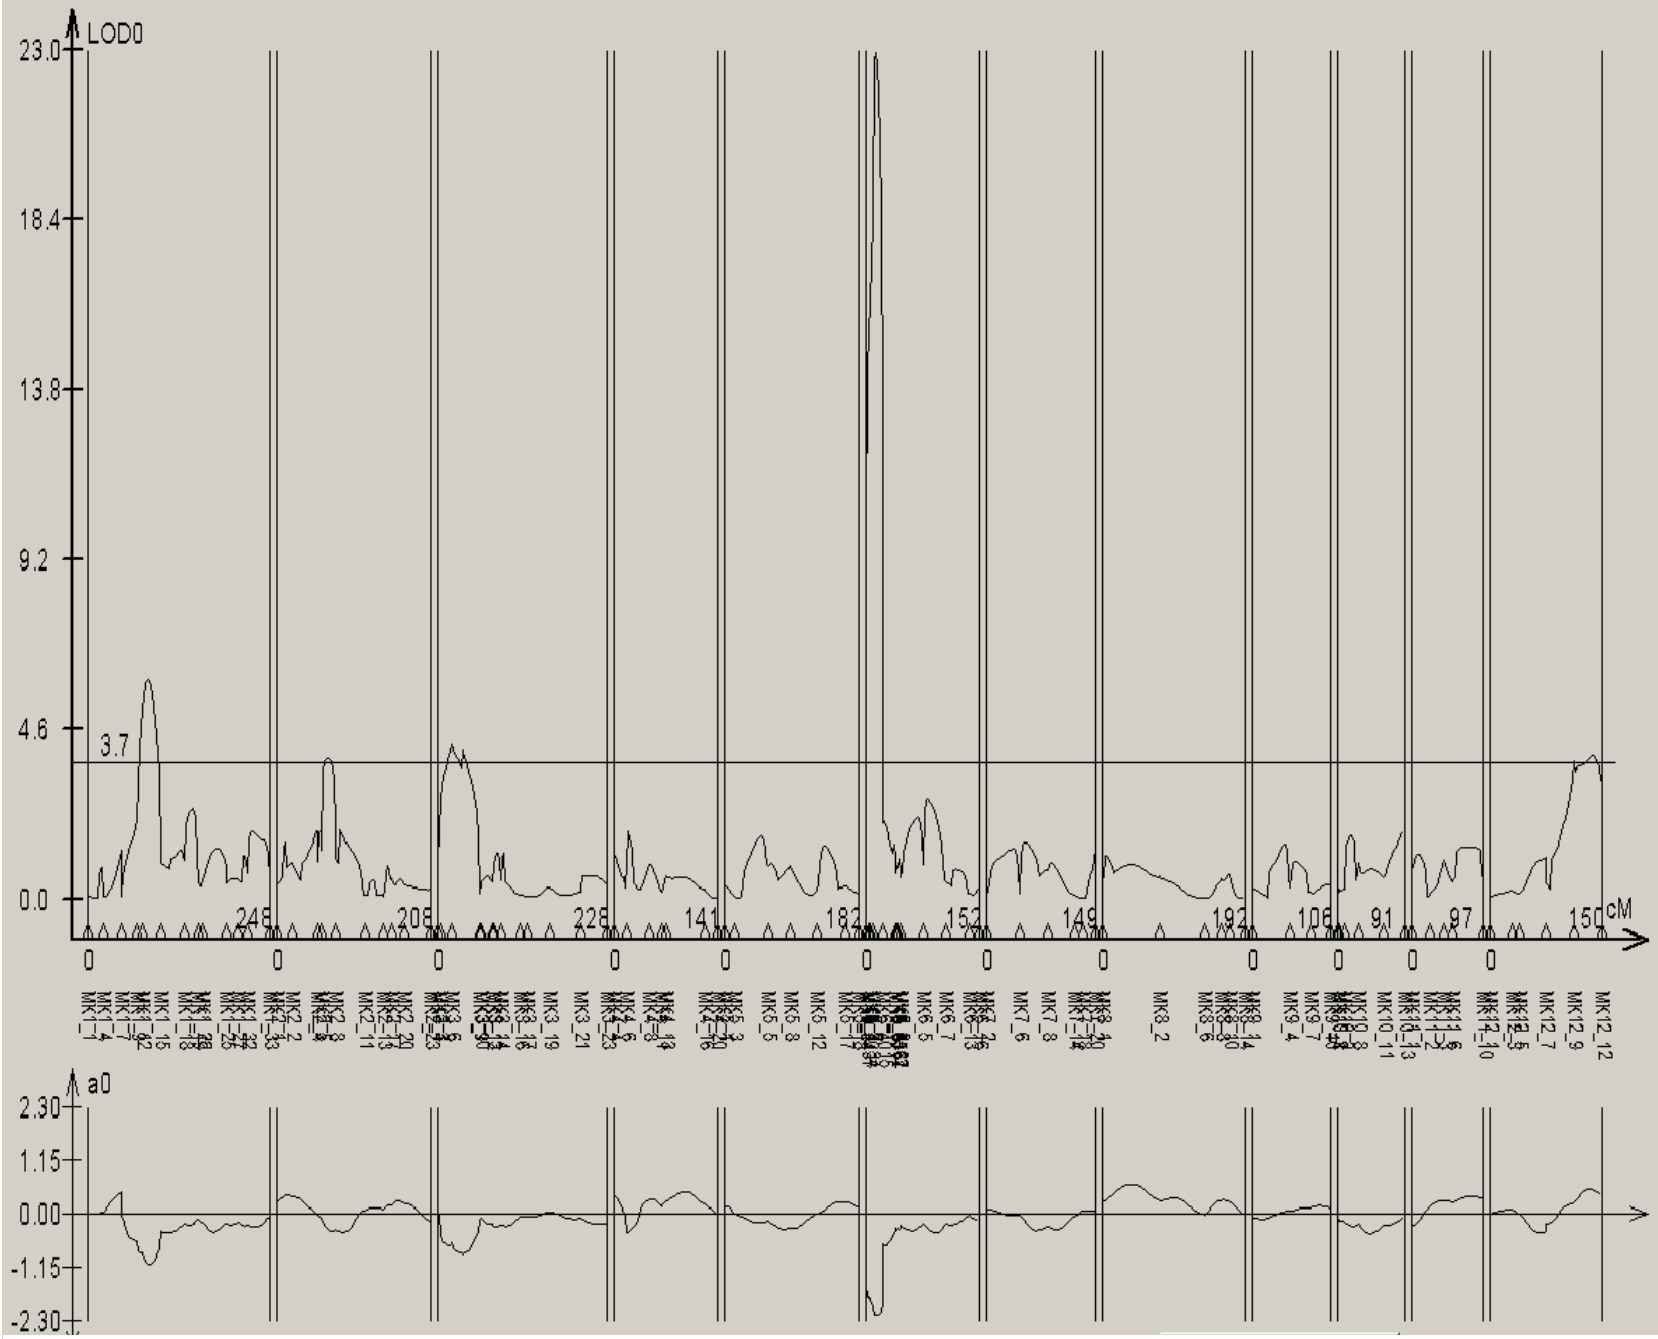

Supplement: dsp004_1.pdf [file dsp004_1.pdf]
